# Supplementary material for: Comprehensive Genomics Investigation of Neboviruses Reveals Distinct Codon Usage Patterns and Host Specificity
Source: MDPI journal article supplement (doi:10.3390/microorganisms12040696), 2024-03-29
Supplement: s1 [file s1]

### Supplementary Tables

**Table S1.** A summary of metadata of complete genome assembly of different NeVs.

| NeVs                                | Scaffold<br>L50 | Scaffold<br>N50 | Contig<br>L50 | Contig<br>N50 | Assembly<br>Level |
|-------------------------------------|-----------------|-----------------|---------------|---------------|-------------------|
| BoNeV/Nebraska/2002/USA/NC_004064   | 1               | 7453            | 1             | 7453          | Complete          |
| BoNeV/TCG-14/2003/JPN/NC_006875     | 1               | 7453            | 1             | 7453          | Complete          |
| BoNeV/Newbury1/2005/UK/NC_007916    | 1               | 7454            | 1             | 7454          | Complete          |
| BoNeV/M3641/2011/HUN/JX018212       | 1               | 7453            | 1             | 7453          | Complete          |
| BoNeV/Kirklareli/2012/TUR/NC_030793 | 1               | 7484            | 1             | 7484          | Complete          |
| BoNeV/Mukti/2016/IND/MN241817       | 1               | 7484            | 1             | 7484          | Complete          |
| BoNeV/LZB-1/2017/CHN/MG599036       | 1               | 7453            | 1             | 7453          | Complete          |
| YAKNeV/NRG-17/2017/CHN/MK452013     | NA              | NA              | NA            | NA            | Complete          |
| BoNeV/YLA-2/2017/CHN/MH718886       | 1               | 7460            | 1             | 7460          | Complete          |
| YAKNeV/HY1-2/2018/CHN/MK452012      | NA              | NA              | NA            | NA            | Complete          |
| BoNeV/11/2021/CHN/OP272996          | NA              | NA              | NA            | NA            | Complete          |
| BoNeV/11/2021/CHN/OP272997          | NA              | NA              | NA            | NA            | Complete          |
| BoNeV/11/2021/CHN/OP272998          | NA              | NA              | NA            | NA            | Complete          |
| BoNeV/11/2021/CHN/OP272999          | NA              | NA              | NA            | NA            | Complete          |
| BoNeV/11/2021/CHN/OP273000          | NA              | NA              | NA            | NA            | Complete          |

**Table S2.** A summary of codon usage (per thousand nucleotides) for the conserved regions of VP1 and VP2 genes of different NeVs.

| Codon | JX01<br>8212 | KT11<br>9483 | MG5<br>99036 | MH7<br>18886 | MK4<br>52012 | MK4<br>52013 | MN2<br>41817 | NC_0<br>04064 | NC_0<br>06875 | NC_0<br>07916 | NC_0<br>30793 | OP27<br>2996 | OP27<br>2997 | OP27<br>2998 | OP27<br>2999 | OP27<br>3000 |
|-------|--------------|--------------|--------------|--------------|--------------|--------------|--------------|---------------|---------------|---------------|---------------|--------------|--------------|--------------|--------------|--------------|
| TTT   | 9.4          | 8.7          | 9.4          | 9.4          | 14.9         | 11.7         | 7.9          | 10.2          | 12.5          | 12.5          | 8.7           | 9.4          | 7.1          | 9.4          | 12.6         | 10.2         |
| TTC   | 17.2         | 15.7         | 14.9         | 16.4         | 14.9         | 16.4         | 17.4         | 16.4          | 14.8          | 16.4          | 15.7          | 15.0         | 17.3         | 15.0         | 11.0         | 12.6         |
| TTA   | 1.6          | 3.2          | 0.8          | 4.7          | 10.2         | 4.7          | 3.2          | 3.1           | 3.9           | 3.9           | 3.2           | 0.8          | 0.8          | 0.8          | 0.8          | 1.6          |
| TTG   | 18.0         | 11.8         | 15.6         | 14.1         | 16.4         | 19.5         | 12.6         | 14.1          | 13.3          | 18.0          | 11.8          | 10.2         | 10.2         | 10.2         | 14.2         | 13.4         |
| CTT   | 12.5         | 20.5         | 17.2         | 17.2         | 15.6         | 14.1         | 19.7         | 16.4          | 16.4          | 18.0          | 20.5          | 16.5         | 15.0         | 16.5         | 18.1         | 18.1         |
| CTC   | 20.3         | 33.1         | 16.4         | 16.4         | 18.0         | 19.5         | 30.8         | 16.4          | 14.1          | 18.0          | 33.1          | 36.2         | 37.8         | 36.2         | 33.9         | 33.1         |
| CTA   | 7.8          | 3.2          | 8.6          | 4.7          | 7.8          | 7.8          | 1.6          | 9.4           | 4.7           | 4.7           | 3.2           | 6.3          | 7.1          | 6.3          | 3.2          | 1.6          |
| CTG   | 21.9         | 18.1         | 21.9         | 24.2         | 13.3         | 15.6         | 18.9         | 21.9          | 27.3          | 20.3          | 18.1          | 15.0         | 14.2         | 15.0         | 16.5         | 16.5         |
| ATT   | 14.8         | 11.0         | 9.4          | 10.9         | 20.3         | 17.2         | 18.9         | 11.7          | 14.8          | 13.3          | 11.0          | 18.9         | 19.7         | 18.9         | 11.8         | 10.2         |
| ATC   | 23.4         | 29.9         | 28.9         | 28.9         | 18.8         | 20.3         | 26.8         | 25.8          | 25.8          | 25.8          | 29.9          | 29.9         | 29.1         | 29.9         | 29.1         | 34.6         |
| ATA   | 12.5         | 9.4          | 11.7         | 10.2         | 8.6          | 9.4          | 10.3         | 10.9          | 10.2          | 10.2          | 9.4           | 9.4          | 10.2         | 9.4          | 10.2         | 7.9          |
| GTT   | 16.4         | 22.8         | 17.2         | 18.8         | 29.7         | 31.3         | 19.7         | 17.2          | 19.5          | 21.1          | 22.8          | 17.3         | 15.0         | 17.3         | 22.0         | 15.7         |
| GTC   | 29.7         | 31.5         | 31.3         | 28.1         | 26.6         | 28.9         | 33.1         | 31.3          | 28.1          | 23.4          | 31.5          | 31.5         | 32.3         | 31.5         | 31.5         | 33.1         |
| GTA   | 0.8          | 2.4          | 4.7          | 6.3          | 3.9          | 4.7          | 1.6          | 2.3           | 4.7           | 4.7           | 2.4           | 0.8          | 0.8          | 0.8          | 2.4          | 5.5          |
| GTG   | 36.7         | 26.8         | 35.2         | 31.3         | 28.1         | 25.8         | 24.4         | 35.2          | 31.3          | 35.9          | 26.8          | 30.7         | 31.5         | 30.7         | 29.9         | 26.8         |
| TCT   | 14.8         | 11.8         | 8.6          | 10.9         | 12.5         | 18.0         | 11.0         | 10.2          | 12.5          | 14.8          | 11.8          | 12.6         | 12.6         | 12.6         | 12.6         | 11.0         |
| TCC   | 21.9         | 18.1         | 26.6         | 24.2         | 19.5         | 14.9         | 18.9         | 25.0          | 24.2          | 27.3          | 18.1          | 20.5         | 20.5         | 20.5         | 16.5         | 20.5         |
| TCA   | 18.8         | 7.9          | 12.5         | 13.3         | 20.3         | 23.5         | 4.7          | 17.2          | 12.5          | 11.7          | 7.9           | 10.2         | 9.4          | 10.2         | 10.2         | 10.2         |
| TCG   | 9.4          | 14.2         | 12.5         | 12.5         | 9.4          | 7.8          | 17.4         | 10.2          | 14.1          | 8.6           | 14.2          | 10.2         | 11.0         | 10.2         | 12.6         | 14.2         |
| AGT   | 6.3          | 4.7          | 7.0          | 7.0          | 8.6          | 8.6          | 4.7          | 7.8           | 9.4           | 10.2          | 4.7           | 1.6          | 3.2          | 1.6          | 5.5          | 3.2          |
| AGC   | 13.3         | 9.4          | 11.7         | 12.5         | 7.8          | 8.6          | 8.7          | 10.2          | 10.9          | 7.0           | 9.4           | 7.9          | 7.1          | 7.9          | 8.7          | 7.9          |

|     |      |      |      |      |      |      |      |      |      |      |      |      |      |      |      |      |
|-----|------|------|------|------|------|------|------|------|------|------|------|------|------|------|------|------|
| CCT | 11.7 | 9.4  | 16.4 | 15.6 | 19.5 | 15.6 | 13.4 | 9.4  | 10.9 | 14.8 | 9.4  | 11.8 | 12.6 | 11.8 | 15.0 | 13.4 |
| CCC | 25.8 | 24.4 | 25.0 | 22.7 | 22.7 | 26.6 | 22.1 | 29.7 | 31.3 | 28.9 | 24.4 | 25.2 | 24.4 | 25.2 | 23.6 | 23.6 |
| CCA | 21.1 | 12.6 | 23.5 | 19.5 | 17.2 | 16.4 | 14.2 | 23.4 | 18.8 | 17.2 | 12.6 | 12.6 | 13.4 | 12.6 | 9.4  | 13.4 |
| CCG | 9.4  | 12.6 | 7.8  | 12.5 | 7.8  | 7.8  | 10.3 | 7.0  | 8.6  | 8.6  | 12.6 | 12.6 | 11.8 | 12.6 | 11.0 | 8.7  |
| ACT | 18.8 | 15.0 | 15.6 | 10.9 | 15.6 | 14.1 | 17.4 | 14.1 | 9.4  | 16.4 | 15.0 | 13.4 | 12.6 | 13.4 | 15.7 | 13.4 |
| ACC | 24.2 | 33.1 | 25.0 | 29.7 | 26.6 | 25.8 | 29.2 | 28.1 | 28.9 | 33.6 | 33.1 | 29.9 | 31.5 | 29.9 | 27.6 | 34.6 |
| ACA | 24.2 | 11.8 | 21.1 | 21.9 | 21.9 | 25.8 | 18.1 | 23.4 | 20.3 | 17.2 | 11.8 | 17.3 | 18.9 | 17.3 | 19.7 | 14.2 |
| ACG | 11.7 | 18.9 | 16.4 | 14.8 | 9.4  | 7.0  | 14.2 | 13.3 | 17.2 | 10.2 | 18.9 | 16.5 | 15.0 | 16.5 | 18.1 | 18.9 |
| GCT | 21.1 | 25.2 | 20.3 | 23.4 | 25.8 | 26.6 | 22.9 | 21.1 | 22.7 | 22.7 | 25.2 | 19.7 | 16.5 | 19.7 | 25.2 | 12.6 |
| GCC | 41.4 | 39.4 | 39.1 | 40.6 | 38.3 | 35.2 | 47.3 | 42.2 | 40.6 | 34.4 | 39.4 | 38.6 | 40.9 | 38.6 | 31.5 | 44.1 |
| GCA | 21.1 | 23.6 | 15.6 | 19.5 | 28.1 | 28.9 | 22.9 | 19.5 | 20.3 | 25.0 | 23.6 | 24.4 | 25.2 | 24.4 | 22.8 | 26.8 |
| GCG | 14.8 | 21.3 | 25.8 | 19.5 | 12.5 | 13.3 | 16.6 | 18.0 | 18.8 | 18.0 | 21.3 | 23.6 | 22.8 | 23.6 | 27.6 | 25.2 |
| TAT | 9.4  | 11.0 | 12.5 | 11.7 | 15.6 | 14.1 | 6.3  | 10.2 | 10.9 | 8.6  | 11.0 | 9.4  | 10.2 | 9.4  | 8.7  | 7.1  |
| TAC | 16.4 | 16.5 | 15.6 | 14.8 | 13.3 | 17.2 | 20.5 | 15.6 | 14.8 | 16.4 | 16.5 | 17.3 | 16.5 | 17.3 | 19.7 | 22.8 |
| CAT | 7.8  | 5.5  | 3.1  | 6.3  | 10.9 | 3.9  | 6.3  | 8.6  | 4.7  | 7.8  | 5.5  | 3.9  | 5.5  | 3.9  | 7.1  | 4.7  |
| CAC | 16.4 | 16.5 | 22.7 | 18.0 | 18.0 | 20.3 | 16.6 | 15.6 | 19.5 | 19.5 | 16.5 | 19.7 | 18.1 | 19.7 | 15.0 | 19.7 |
| CAA | 7.0  | 7.9  | 10.9 | 10.2 | 16.4 | 16.4 | 8.7  | 10.9 | 9.4  | 10.2 | 7.9  | 7.1  | 7.1  | 7.1  | 10.2 | 7.1  |
| CAG | 17.2 | 20.5 | 13.3 | 14.1 | 11.7 | 13.3 | 20.5 | 12.5 | 14.1 | 14.1 | 20.5 | 21.3 | 21.3 | 21.3 | 16.5 | 22.0 |
| AAT | 11.7 | 11.8 | 16.4 | 17.2 | 14.9 | 18.8 | 12.6 | 23.4 | 18.0 | 18.8 | 11.8 | 15.7 | 16.5 | 15.7 | 9.4  | 9.4  |
| AAC | 31.3 | 17.3 | 29.7 | 26.6 | 24.2 | 21.9 | 17.4 | 20.3 | 25.0 | 27.3 | 17.3 | 16.5 | 15.7 | 16.5 | 21.3 | 22.0 |
| AAA | 8.6  | 7.1  | 9.4  | 10.2 | 16.4 | 16.4 | 7.9  | 11.7 | 12.5 | 14.8 | 7.1  | 7.1  | 7.1  | 7.1  | 4.7  | 7.9  |
| AAG | 26.6 | 22.8 | 25.8 | 25.8 | 21.1 | 20.3 | 23.7 | 23.4 | 23.4 | 18.8 | 22.8 | 27.6 | 26.8 | 27.6 | 28.3 | 22.0 |
| GAT | 23.4 | 18.9 | 14.9 | 17.2 | 26.6 | 27.4 | 26.0 | 18.8 | 19.5 | 22.7 | 18.9 | 20.5 | 20.5 | 20.5 | 22.0 | 21.3 |
| GAC | 25.0 | 40.2 | 33.6 | 32.0 | 27.4 | 25.0 | 31.5 | 30.5 | 30.5 | 27.3 | 40.2 | 37.8 | 37.8 | 37.8 | 33.9 | 32.3 |
| GAA | 12.5 | 13.4 | 14.9 | 14.8 | 18.0 | 18.8 | 10.3 | 13.3 | 10.2 | 7.8  | 13.4 | 7.1  | 7.1  | 7.1  | 14.2 | 11.8 |
| GAG | 25.0 | 26.8 | 21.9 | 23.4 | 18.0 | 18.8 | 30.0 | 23.4 | 26.6 | 28.1 | 26.8 | 30.7 | 30.7 | 30.7 | 26.0 | 29.9 |
| TGT | 5.5  | 3.2  | 3.1  | 7.0  | 3.1  | 3.1  | 4.7  | 6.3  | 9.4  | 5.5  | 3.2  | 7.1  | 6.3  | 7.1  | 7.1  | 3.2  |
| TGC | 9.4  | 8.7  | 13.3 | 7.8  | 5.5  | 5.5  | 7.1  | 8.6  | 5.5  | 8.6  | 8.7  | 3.9  | 4.7  | 3.9  | 4.7  | 7.9  |
| CGT | 4.7  | 9.4  | 5.5  | 7.0  | 5.5  | 4.7  | 8.7  | 7.0  | 5.5  | 6.3  | 9.4  | 7.1  | 7.1  | 7.1  | 8.7  | 9.4  |
| CGC | 19.5 | 15.0 | 16.4 | 15.6 | 12.5 | 12.5 | 15.0 | 16.4 | 18.0 | 14.8 | 15.0 | 16.5 | 16.5 | 16.5 | 18.9 | 13.4 |
| CGA | 3.1  | 2.4  | 1.6  | 3.1  | 4.7  | 4.7  | 5.5  | 3.1  | 3.1  | 1.6  | 2.4  | 6.3  | 6.3  | 6.3  | 3.2  | 5.5  |
| CGG | 9.4  | 14.2 | 7.8  | 9.4  | 9.4  | 9.4  | 12.6 | 10.9 | 10.2 | 12.5 | 14.2 | 11.0 | 11.0 | 11.0 | 13.4 | 14.2 |
| AGA | 3.1  | 3.2  | 4.7  | 3.1  | 8.6  | 9.4  | 3.2  | 4.7  | 5.5  | 4.7  | 3.2  | 1.6  | 1.6  | 1.6  | 2.4  | 3.2  |
| AGG | 8.6  | 11.0 | 9.4  | 7.8  | 7.0  | 7.8  | 8.7  | 7.8  | 7.0  | 8.6  | 11.0 | 9.4  | 10.2 | 9.4  | 9.4  | 9.4  |
| GGT | 15.6 | 29.1 | 14.9 | 13.3 | 22.7 | 21.1 | 30.8 | 10.2 | 9.4  | 14.8 | 29.1 | 28.3 | 27.6 | 28.3 | 24.4 | 26.0 |
| GGC | 36.7 | 27.6 | 33.6 | 38.3 | 30.5 | 30.5 | 21.3 | 43.8 | 43.0 | 36.7 | 27.6 | 28.3 | 28.3 | 28.3 | 28.3 | 29.1 |
| GGA | 8.6  | 8.7  | 5.5  | 7.0  | 12.5 | 13.3 | 10.3 | 4.7  | 4.7  | 6.3  | 8.7  | 8.7  | 5.5  | 8.7  | 10.2 | 5.5  |
| GGG | 24.2 | 26.0 | 27.4 | 25.8 | 16.4 | 16.4 | 29.2 | 25.8 | 26.6 | 25.8 | 26.0 | 26.8 | 29.9 | 26.8 | 26.8 | 29.9 |
| ATG | 25.0 | 22.0 | 22.7 | 24.2 | 22.7 | 21.9 | 22.1 | 25.0 | 25.0 | 22.7 | 22.0 | 24.4 | 24.4 | 24.4 | 22.8 | 24.4 |
| TGG | 15.6 | 22.0 | 15.6 | 15.6 | 15.6 | 15.6 | 22.1 | 15.6 | 15.6 | 16.4 | 22.0 | 22.0 | 22.0 | 22.0 | 22.0 | 22.0 |

**Table S3.** A summary of codon usage per thousand nucleotides for the non-conserved regions of VP1 and VP2 genes of NeVs.

| Codon | JX01<br>8212 | KT11<br>9483 | MG5<br>99036 | MH7<br>18886 | MK4<br>52012 | MK4<br>52013 | MN2<br>41817 | NC_0<br>04064 | NC_0<br>06875 | NC_0<br>07916 | NC_0<br>30793 | OP27<br>2996 | OP27<br>2997 | OP27<br>2998 | OP27<br>2999 | OP27<br>3000 |
|-------|--------------|--------------|--------------|--------------|--------------|--------------|--------------|---------------|---------------|---------------|---------------|--------------|--------------|--------------|--------------|--------------|
| TTT   | 13.0         | 9.4          | 15.6         | 12.1         | 17.3         | 21.6         | 12.0         | 13.0          | 15.6          | 15.6          | 9.4           | 12.8         | 15.3         | 12.8         | 9.4          | 9.4          |
| TTC   | 19.0         | 17.9         | 15.6         | 19.0         | 16.4         | 14.7         | 14.6         | 19.0          | 19.0          | 15.6          | 17.9          | 11.9         | 9.4          | 11.9         | 17.0         | 17.0         |
| TTA   | 6.1          | 0.0          | 5.2          | 3.5          | 5.2          | 8.6          | 0.9          | 0.9           | 2.6           | 5.2           | 0.0           | 0.9          | 2.6          | 0.9          | 0.0          | 2.6          |
| TTG   | 19.0         | 12.8         | 21.6         | 20.8         | 19.0         | 17.3         | 10.3         | 18.2          | 21.6          | 22.5          | 12.8          | 7.7          | 7.7          | 7.7          | 8.5          | 10.2         |
| CTT   | 14.7         | 14.5         | 13.8         | 18.2         | 13.0         | 17.3         | 18.0         | 20.8          | 15.6          | 16.5          | 14.5          | 21.3         | 21.3         | 22.1         | 17.9         | 14.5         |
| CTC   | 26.0         | 31.5         | 18.2         | 19.9         | 19.0         | 14.7         | 24.8         | 20.8          | 26.0          | 23.4          | 31.5          | 22.1         | 23.0         | 21.3         | 25.6         | 26.4         |
| CTA   | 4.3          | 6.8          | 7.8          | 4.3          | 7.8          | 7.8          | 4.3          | 7.8           | 8.7           | 6.9           | 6.8           | 6.0          | 3.4          | 6.0          | 7.7          | 7.7          |

|     |      |      |      |      |      |      |      |      |      |      |      |      |      |      |      |      |
|-----|------|------|------|------|------|------|------|------|------|------|------|------|------|------|------|------|
| CTG | 22.5 | 15.3 | 26.0 | 25.1 | 19.9 | 19.0 | 18.0 | 23.4 | 18.2 | 19.9 | 15.3 | 22.1 | 22.1 | 22.1 | 19.6 | 17.9 |
| ATT | 21.6 | 18.7 | 24.2 | 20.8 | 19.0 | 19.0 | 17.1 | 21.6 | 26.8 | 16.5 | 18.7 | 18.7 | 15.3 | 18.7 | 17.0 | 17.0 |
| ATC | 21.6 | 25.6 | 19.0 | 23.4 | 20.7 | 19.0 | 26.5 | 22.5 | 18.2 | 23.4 | 25.6 | 23.0 | 26.4 | 23.0 | 25.6 | 29.8 |
| ATA | 6.1  | 10.2 | 5.2  | 2.6  | 13.8 | 13.8 | 11.1 | 4.3  | 3.5  | 7.8  | 10.2 | 11.1 | 11.1 | 11.1 | 11.9 | 11.9 |
| GTT | 16.5 | 19.6 | 16.4 | 16.5 | 25.1 | 23.3 | 15.4 | 17.3 | 21.6 | 22.5 | 19.6 | 21.3 | 21.3 | 21.3 | 12.8 | 14.5 |
| GTC | 17.3 | 25.6 | 19.9 | 17.3 | 11.2 | 13.8 | 30.8 | 17.3 | 19.0 | 13.9 | 25.6 | 29.8 | 29.8 | 29.8 | 33.2 | 32.4 |
| GTA | 6.9  | 2.6  | 6.1  | 2.6  | 3.5  | 5.2  | 4.3  | 6.1  | 10.4 | 4.3  | 2.6  | 2.6  | 3.4  | 2.6  | 2.6  | 2.6  |
| GTG | 33.8 | 19.6 | 32.0 | 39.8 | 25.9 | 25.9 | 19.7 | 35.5 | 28.6 | 31.2 | 19.6 | 21.3 | 20.4 | 21.3 | 22.1 | 18.7 |
| TCT | 7.8  | 7.7  | 6.9  | 8.7  | 14.7 | 11.2 | 10.3 | 7.8  | 11.3 | 6.9  | 7.7  | 7.7  | 8.5  | 7.7  | 8.5  | 7.7  |
| TCC | 21.6 | 14.5 | 27.7 | 22.5 | 19.0 | 19.0 | 15.4 | 24.2 | 24.2 | 22.5 | 14.5 | 17.0 | 17.0 | 17.0 | 15.3 | 16.2 |
| TCA | 14.7 | 11.9 | 14.7 | 15.6 | 19.9 | 21.6 | 10.3 | 17.3 | 16.5 | 15.6 | 11.9 | 13.6 | 13.6 | 13.6 | 10.2 | 12.8 |
| TCG | 13.9 | 12.8 | 13.0 | 10.4 | 10.4 | 11.2 | 12.0 | 7.8  | 7.8  | 11.3 | 12.8 | 12.8 | 12.8 | 12.8 | 11.9 | 9.4  |
| AGT | 9.5  | 8.5  | 6.1  | 5.2  | 10.4 | 10.4 | 9.4  | 10.4 | 8.7  | 7.8  | 8.5  | 11.9 | 9.4  | 11.9 | 8.5  | 9.4  |
| AGC | 10.4 | 15.3 | 13.8 | 13.0 | 10.4 | 13.8 | 11.1 | 10.4 | 13.0 | 13.0 | 15.3 | 7.7  | 9.4  | 7.7  | 12.8 | 15.3 |
| CCT | 20.8 | 8.5  | 13.8 | 14.7 | 16.4 | 20.7 | 15.4 | 20.8 | 19.9 | 16.5 | 8.5  | 15.3 | 12.8 | 16.2 | 14.5 | 17.0 |
| CCC | 22.5 | 30.7 | 26.0 | 25.1 | 28.5 | 22.5 | 27.4 | 18.2 | 17.3 | 24.2 | 30.7 | 28.1 | 30.7 | 27.3 | 31.5 | 26.4 |
| CCA | 20.8 | 23.0 | 15.6 | 14.7 | 25.9 | 25.9 | 20.5 | 19.9 | 21.6 | 18.2 | 23.0 | 16.2 | 17.0 | 16.2 | 21.3 | 17.0 |
| CCG | 13.0 | 14.5 | 19.0 | 20.8 | 9.5  | 11.2 | 13.7 | 16.5 | 14.7 | 15.6 | 14.5 | 16.2 | 15.3 | 16.2 | 13.6 | 16.2 |
| ACT | 13.9 | 18.7 | 11.2 | 9.5  | 13.8 | 12.1 | 12.8 | 11.3 | 9.5  | 7.8  | 18.7 | 17.9 | 17.0 | 17.9 | 20.4 | 21.3 |
| ACC | 19.0 | 34.9 | 27.7 | 29.4 | 21.6 | 22.5 | 38.5 | 25.1 | 26.0 | 25.1 | 34.9 | 31.5 | 33.2 | 31.5 | 31.5 | 34.1 |
| ACA | 7.8  | 17.0 | 7.8  | 10.4 | 16.4 | 14.7 | 18.0 | 7.8  | 11.3 | 8.7  | 17.0 | 18.7 | 16.2 | 18.7 | 11.1 | 8.5  |
| ACG | 16.5 | 17.0 | 13.8 | 14.7 | 11.2 | 8.6  | 15.4 | 16.5 | 15.6 | 18.2 | 17.0 | 10.2 | 11.9 | 10.2 | 17.9 | 16.2 |
| GCT | 19.0 | 24.7 | 22.5 | 20.8 | 23.3 | 25.1 | 18.0 | 20.8 | 13.9 | 22.5 | 24.7 | 25.6 | 25.6 | 25.6 | 19.6 | 25.6 |
| GCC | 48.5 | 47.7 | 36.3 | 43.3 | 29.4 | 27.7 | 53.1 | 43.3 | 47.6 | 45.9 | 47.7 | 48.6 | 48.6 | 48.6 | 51.1 | 46.0 |
| GCA | 13.0 | 20.4 | 14.7 | 16.5 | 15.6 | 17.3 | 25.7 | 10.4 | 10.4 | 13.0 | 20.4 | 22.1 | 22.1 | 22.1 | 21.3 | 18.7 |
| GCG | 9.5  | 21.3 | 11.2 | 8.7  | 5.2  | 4.3  | 20.5 | 13.0 | 13.0 | 11.3 | 21.3 | 22.1 | 21.3 | 22.1 | 20.4 | 24.7 |
| TAT | 4.3  | 10.2 | 8.7  | 10.4 | 13.8 | 12.1 | 10.3 | 6.1  | 8.7  | 6.1  | 10.2 | 6.8  | 6.8  | 6.8  | 8.5  | 7.7  |
| TAC | 18.2 | 12.8 | 13.0 | 11.3 | 9.5  | 13.0 | 12.8 | 15.6 | 13.0 | 15.6 | 12.8 | 17.0 | 17.9 | 17.0 | 14.5 | 15.3 |
| CAT | 6.9  | 7.7  | 11.2 | 7.8  | 7.8  | 6.9  | 6.0  | 8.7  | 10.4 | 10.4 | 7.7  | 3.4  | 3.4  | 3.4  | 8.5  | 6.8  |
| CAC | 14.7 | 10.2 | 8.7  | 12.1 | 12.1 | 12.1 | 10.3 | 11.3 | 8.7  | 11.3 | 10.2 | 14.5 | 13.6 | 14.5 | 11.1 | 10.2 |
| CAA | 18.2 | 11.1 | 14.7 | 15.6 | 23.3 | 23.3 | 11.1 | 19.9 | 14.7 | 21.6 | 11.1 | 12.8 | 12.8 | 12.8 | 14.5 | 13.6 |
| CAG | 23.4 | 21.3 | 25.1 | 26.0 | 17.3 | 18.2 | 23.1 | 21.6 | 26.8 | 20.8 | 21.3 | 19.6 | 19.6 | 19.6 | 19.6 | 19.6 |
| AAT | 18.2 | 13.6 | 18.2 | 15.6 | 15.6 | 20.7 | 13.7 | 15.6 | 19.9 | 15.6 | 13.6 | 16.2 | 15.3 | 16.2 | 25.6 | 13.6 |
| AAC | 19.0 | 29.0 | 20.8 | 22.5 | 22.5 | 19.0 | 28.3 | 19.0 | 18.2 | 19.0 | 29.0 | 28.1 | 29.8 | 28.1 | 20.4 | 28.1 |
| AAA | 10.4 | 7.7  | 10.4 | 12.1 | 15.6 | 17.3 | 8.6  | 9.5  | 13.9 | 9.5  | 7.7  | 11.1 | 11.9 | 11.1 | 7.7  | 4.3  |
| AAG | 30.3 | 23.0 | 29.4 | 28.6 | 26.8 | 25.1 | 21.4 | 33.8 | 26.8 | 31.2 | 23.0 | 18.7 | 17.9 | 18.7 | 23.9 | 23.0 |
| GAT | 18.2 | 20.4 | 14.7 | 13.9 | 18.2 | 22.5 | 19.7 | 18.2 | 18.2 | 20.8 | 20.4 | 12.8 | 14.5 | 12.8 | 19.6 | 12.8 |
| GAC | 30.3 | 19.6 | 38.1 | 35.5 | 28.5 | 21.6 | 23.1 | 32.9 | 33.8 | 31.2 | 19.6 | 26.4 | 24.7 | 26.4 | 23.9 | 28.1 |
| GAA | 15.6 | 13.6 | 15.6 | 13.9 | 19.0 | 19.0 | 13.7 | 16.5 | 10.4 | 13.9 | 13.6 | 12.8 | 11.9 | 12.8 | 7.7  | 11.9 |
| GAG | 31.2 | 29.0 | 25.1 | 29.4 | 29.4 | 29.4 | 26.5 | 29.4 | 32.0 | 30.3 | 29.0 | 30.7 | 31.5 | 30.7 | 34.1 | 32.4 |
| TGT | 4.3  | 6.0  | 2.6  | 3.5  | 5.2  | 3.5  | 6.0  | 3.5  | 1.7  | 0.9  | 6.0  | 6.8  | 6.8  | 6.8  | 6.0  | 5.1  |
| TGC | 6.1  | 11.1 | 9.5  | 8.7  | 9.5  | 6.9  | 12.0 | 7.8  | 7.8  | 8.7  | 11.1 | 9.4  | 9.4  | 9.4  | 11.1 | 11.9 |
| CGT | 6.9  | 10.2 | 10.4 | 10.4 | 4.3  | 6.1  | 8.6  | 6.1  | 7.8  | 9.5  | 10.2 | 11.1 | 11.9 | 11.1 | 6.8  | 10.2 |
| CGC | 22.5 | 30.7 | 21.6 | 19.9 | 19.0 | 16.4 | 31.7 | 23.4 | 22.5 | 15.6 | 30.7 | 27.3 | 26.4 | 27.3 | 29.0 | 29.8 |
| CGA | 3.5  | 3.4  | 3.5  | 3.5  | 3.5  | 4.3  | 2.6  | 5.2  | 5.2  | 6.1  | 3.4  | 4.3  | 3.4  | 4.3  | 3.4  | 3.4  |
| CGG | 8.7  | 6.0  | 6.9  | 6.9  | 12.1 | 12.1 | 8.6  | 6.9  | 3.5  | 9.5  | 6.0  | 9.4  | 10.2 | 9.4  | 9.4  | 8.5  |
| AGA | 6.1  | 0.9  | 4.3  | 5.2  | 9.5  | 10.4 | 0.9  | 4.3  | 6.9  | 5.2  | 0.9  | 1.7  | 1.7  | 1.7  | 4.3  | 2.6  |
| AGG | 11.3 | 8.5  | 12.1 | 13.0 | 9.5  | 7.8  | 10.3 | 10.4 | 10.4 | 14.7 | 8.5  | 8.5  | 8.5  | 8.5  | 5.1  | 11.1 |
| GGT | 17.3 | 20.4 | 21.6 | 12.1 | 25.1 | 24.2 | 22.3 | 14.7 | 19.0 | 15.6 | 20.4 | 15.3 | 18.7 | 15.3 | 14.5 | 20.4 |
| GGC | 34.6 | 32.4 | 32.0 | 43.3 | 29.4 | 32.0 | 30.0 | 39.0 | 34.6 | 39.0 | 32.4 | 38.3 | 33.2 | 38.3 | 34.9 | 29.0 |
| GGA | 5.2  | 6.0  | 6.1  | 5.2  | 14.7 | 12.1 | 9.4  | 6.9  | 11.3 | 9.5  | 6.0  | 9.4  | 10.2 | 9.4  | 6.8  | 9.4  |
| GGG | 26.0 | 22.1 | 26.0 | 26.0 | 17.3 | 18.2 | 19.7 | 24.2 | 19.9 | 19.0 | 22.1 | 17.9 | 18.7 | 17.9 | 22.1 | 18.7 |
| ATG | 17.3 | 23.0 | 20.8 | 17.3 | 23.3 | 24.2 | 23.1 | 19.0 | 15.6 | 19.0 | 23.0 | 23.0 | 23.0 | 23.0 | 23.9 | 26.4 |

|     |      |      |      |      |      |      |      |      |      |      |      |      |      |      |      |      |
|-----|------|------|------|------|------|------|------|------|------|------|------|------|------|------|------|------|
| TGG | 20.8 | 11.1 | 20.8 | 20.8 | 19.9 | 20.7 | 11.1 | 20.8 | 20.8 | 21.6 | 11.1 | 11.1 | 11.1 | 11.1 | 11.1 | 11.1 |
|-----|------|------|------|------|------|------|------|------|------|------|------|------|------|------|------|------|

**Table S4.** A summary of Effective Number of Codons (ENC) in VP1 and VP2 gene of different NeVs. The GC composition at 3<sup>rd</sup> synonymous codon position (GC3s), observed ENC (oENC), expected ENC (eENC) and deviation in oENC and eENC ( $\Delta$ ENC) are summarized. The corresponding values for VP2 are provided in parenthesis.

| NeVs                                | GC3s        | oENC        | eENC        | $\Delta$ ENC |
|-------------------------------------|-------------|-------------|-------------|--------------|
| BoNeV/Mukti/2016/IND/MN241817       | 0.63 (0.61) | 52.1 (53.2) | 56.6 (57.9) | 4.5 (4.7)    |
| BoNev/Kirklareli/2012/TUR/NC_030793 | 0.64 (0.63) | 52.0 (52.7) | 56.2 (57.1) | 4.2 (4.4)    |
| BoNeV/TCG-14/2003/JPN/NC_006875     | 0.63 (0.55) | 53.2 (56.2) | 56.8 (60.3) | 3.6 (4.1)    |
| BoNev/Newbury1/2005/UK/NC_007916    | 0.63 (0.57) | 52.5 (53.1) | 56.7 (59.5) | 4.2 (6.4)    |
| BoNeV/LZB-1/2017/CHN/MG599036       | 0.65 (0.60) | 52.7 (50.3) | 55.9 (58.3) | 3.2 (8.0)    |
| BoNeV/M3641/2011/HUN/JX018212       | 0.64 (0.56) | 52.2 (50.8) | 56.4 (59.9) | 4.2 (9.1)    |
| BoNeV/YLA-2/2017/CHN/MH718886       | 0.65 (0.59) | 52.7 (47.5) | 55.9 (58.7) | 3.2 (11.2)   |
| YAKNeV/HY1-2/2018/CHN/MK452012      | 0.54 (0.47) | 56.2 (57.5) | 60.2 (60.2) | 4.0 (2.7)    |
| YAKNeV/NRG-17/2017/CHN/MK452013     | 0.54 (0.43) | 56.1 (56.5) | 60.3 (59.3) | 4.2 (2.8)    |
| BoNev/Newbury1/2005/UK/NC_007916    | 0.63 (0.55) | 53.6 (52.5) | 57.0 (59.9) | 3.4 (7.4)    |
| BoNeV/11/2021/CHN/OP272996          | 0.64 (0.56) | 51.6 (55.7) | 56.4 (59.7) | 4.8 (4.0)    |
| BoNeV/11/2021/CHN/OP272997          | 0.65 (0.56) | 51.5 (55.8) | 55.9 (59.7) | 4.4 (4.1)    |
| BoNeV/11/2021/CHN/OP272998          | 0.64 (0.56) | 51.6 (55.7) | 56.4 (59.7) | 4.8 (4.0)    |
| BoNeV/11/2021/CHN/OP272999          | 0.64 (0.59) | 52.3 (53.9) | 56.4 (58.7) | 4.1 (4.8)    |
| BoNeV/11/2021/CHN/OP273000          | 0.67 (0.61) | 51.4 (53.6) | 54.7 (57.9) | 3.3 (4.3)    |

**Table S5.** A summary of correlation analysis ( $R^2$ ) of RSCU between different NeVs and potential hosts.

| GenBank Id | <i>Bos taurus</i> | <i>Bubalus bubalis</i> | <i>Capra hircus</i> | <i>Ovis aries</i> | <i>Equus caballus</i> | <i>Equus asinus</i> | <i>Camelus dromedarius</i> |
|------------|-------------------|------------------------|---------------------|-------------------|-----------------------|---------------------|----------------------------|
| MN241817   | 0.34              | 0.28                   | 0.27                | 0.31              | 0.33                  | 0.31                | 0.32                       |
| NC_030793  | 0.31              | 0.26                   | 0.25                | 0.29              | 0.30                  | 0.31                | 0.30                       |
| NC_006875  | 0.48              | 0.43                   | 0.43                | 0.34              | 0.49                  | 0.38                | 0.47                       |
| NC_004064  | 0.47              | 0.41                   | 0.41                | 0.34              | 0.47                  | 0.39                | 0.47                       |
| MG599036   | 0.44              | 0.39                   | 0.38                | 0.33              | 0.44                  | 0.40                | 0.46                       |
| JX018212   | 0.50              | 0.43                   | 0.43                | 0.36              | 0.50                  | 0.40                | 0.47                       |
| MH718886   | 0.53              | 0.46                   | 0.46                | 0.39              | 0.53                  | 0.44                | 0.53                       |
| MK452012   | 0.32              | 0.31                   | 0.31                | 0.23              | 0.32                  | 0.31                | 0.31                       |
| MK452013   | 0.32              | 0.32                   | 0.31                | 0.20              | 0.33                  | 0.31                | 0.31                       |
| NC_007916  | 0.48              | 0.44                   | 0.43                | 0.39              | 0.48                  | 0.47                | 0.49                       |
| OP272996   | 0.34              | 0.27                   | 0.27                | 0.28              | 0.34                  | 0.29                | 0.34                       |
| OP272997   | 0.34              | 0.28                   | 0.27                | 0.30              | 0.34                  | 0.31                | 0.34                       |
| OP272998   | 0.34              | 0.27                   | 0.27                | 0.28              | 0.34                  | 0.28                | 0.34                       |
| OP272999   | 0.33              | 0.26                   | 0.26                | 0.29              | 0.33                  | 0.28                | 0.30                       |

|          |      |      |      |      |      |      |      |
|----------|------|------|------|------|------|------|------|
| OP273000 | 0.35 | 0.31 | 0.29 | 0.34 | 0.36 | 0.37 | 0.37 |
|----------|------|------|------|------|------|------|------|

**Table S6.** A summary of common preferred codons (out of 59 codons) in different strains of NeVs and different hosts. In the parenthesis the total number preferred codons in NeVs and hosts are provided.

| GenBank Id     | <i>B. Taurus</i><br>(28) | <i>B. bubalis</i><br>(26) | <i>C. hircus</i><br>(26) | <i>O. aries</i><br>(27) | <i>E. caballus</i><br>(27) | <i>E. asinus</i><br>(26) | <i>C. dromedarius</i><br>(26) |
|----------------|--------------------------|---------------------------|--------------------------|-------------------------|----------------------------|--------------------------|-------------------------------|
| MN241817 (26)  | 21                       | 20                        | 20                       | 19                      | 21                         | 20                       | 20                            |
| NC_030793 (30) | 23                       | 22                        | 22                       | 21                      | 23                         | 22                       | 22                            |
| NC_006875 (27) | 20                       | 20                        | 20                       | 19                      | 20                         | 20                       | 19                            |
| NC_004064 (27) | 21                       | 20                        | 20                       | 19                      | 21                         | 20                       | 20                            |
| MG599036 (26)  | 21                       | 21                        | 21                       | 20                      | 21                         | 21                       | 20                            |
| JX018212 (27)  | 22                       | 21                        | 21                       | 20                      | 22                         | 21                       | 21                            |
| MH718886 (25)  | 21                       | 20                        | 20                       | 19                      | 21                         | 20                       | 20                            |
| MK452012 (30)  | 20                       | 18                        | 19                       | 18                      | 19                         | 18                       | 18                            |
| MK452013 (33)  | 22                       | 20                        | 20                       | 18                      | 21                         | 20                       | 20                            |
| NC_007916 (26) | 21                       | 19                        | 20                       | 19                      | 21                         | 19                       | 20                            |
| OP272996 (27)  | 20                       | 18                        | 18                       | 17                      | 20                         | 18                       | 19                            |
| OP272997 (26)  | 21                       | 19                        | 19                       | 18                      | 21                         | 19                       | 20                            |
| OP272998 (27)  | 20                       | 18                        | 18                       | 17                      | 20                         | 18                       | 19                            |
| OP272999 (24)  | 21                       | 19                        | 19                       | 18                      | 21                         | 19                       | 20                            |
| OP273000 (26)  | 22                       | 20                        | 20                       | 19                      | 22                         | 20                       | 21                            |

**Table S7.** A summary of codon adaptation indices of VP1 gene of NeVs corresponding to different host.

| NeVs                                | <i>B. taurus</i> | <i>B. bubalis</i> | <i>C. hircus</i> | <i>O. aries</i> | <i>E. caballus</i> | <i>E. asinus</i> | <i>C. dromedarius</i> |
|-------------------------------------|------------------|-------------------|------------------|-----------------|--------------------|------------------|-----------------------|
| BoNeV/Nebraska/2002/USA/NC_004064   | 0.712            | 0.719             | 0.700            | 0.676           | 0.711              | 0.703            | 0.667                 |
| BoNeV/TCG-14/2003/JPN/NC_006875     | 0.711            | 0.716             | 0.697            | 0.673           | 0.708              | 0.699            | 0.662                 |
| BoNeV/Newbury1/2005/UK/NC_007916    | 0.711            | 0.718             | 0.700            | 0.683           | 0.710              | 0.707            | 0.665                 |
| BoNeV/M3641/2011/HUN/JX018212       | 0.720            | 0.725             | 0.707            | 0.687           | 0.719              | 0.710            | 0.672                 |
| BoNeV/Kirklareli/2012/TUR/NC_030793 | 0.694            | 0.698             | 0.680            | 0.669           | 0.693              | 0.695            | 0.646                 |
| BoNeV/Mukti/2016/IND/MN241817       | 0.700            | 0.703             | 0.685            | 0.674           | 0.698              | 0.696            | 0.650                 |
| BoNeV/LZB-1/2017/CHN/MG599036       | 0.707            | 0.711             | 0.692            | 0.674           | 0.705              | 0.697            | 0.661                 |

|                                 |       |       |       |       |       |       |       |
|---------------------------------|-------|-------|-------|-------|-------|-------|-------|
| YAKNeV/NRG-17/2017/CHN/MK452013 | 0.691 | 0.702 | 0.683 | 0.658 | 0.688 | 0.684 | 0.642 |
| BoNeV/YLA-2/2017/CHN/MH718886   | 0.718 | 0.722 | 0.704 | 0.686 | 0.716 | 0.710 | 0.673 |
| YAKNeV/HY1-2/2018/CHN/MK452012  | 0.693 | 0.702 | 0.686 | 0.663 | 0.691 | 0.685 | 0.644 |
| BoNeV/11/2021/CHN/OP272996      | 0.698 | 0.702 | 0.683 | 0.668 | 0.697 | 0.691 | 0.651 |
| BoNeV/11/2021/CHN/OP272997      | 0.699 | 0.702 | 0.683 | 0.671 | 0.697 | 0.693 | 0.651 |
| BoNeV/11/2021/CHN/OP272998      | 0.698 | 0.701 | 0.683 | 0.668 | 0.697 | 0.691 | 0.65  |
| BoNeV/11/2021/CHN/OP272999      | 0.692 | 0.696 | 0.677 | 0.663 | 0.692 | 0.689 | 0.642 |
| BoNeV/11/2021/CHN/OP273000      | 0.702 | 0.705 | 0.686 | 0.678 | 0.701 | 0.7   | 0.655 |

**Table S8.** A summary of codon adaptation indices of VP2 gene of NeVs corresponding to different host.

| <u>NeVs</u>                         | <i>B. taurus</i> | <i>B. bubalis</i> | <i>C. hircus</i> | <i>O. aries</i> | <i>E. caballus</i> | <i>E. asinus</i> | <i>C. dromedarius</i> |
|-------------------------------------|------------------|-------------------|------------------|-----------------|--------------------|------------------|-----------------------|
| BoNeV/Nebraska/2002/USA/NC 004064   | 0.707            | 0.723             | 0.703            | 0.683           | 0.710              | 0.724            | 0.649                 |
| BoNeV/TCG-14/2003/JPN/NC 006875     | 0.709            | 0.717             | 0.700            | 0.679           | 0.707              | 0.694            | 0.646                 |
| BoNeV/Newbury1/2005/UK/NC 007916    | 0.716            | 0.728             | 0.711            | 0.689           | 0.717              | 0.711            | 0.652                 |
| BoNeV/M3641/2011/HUN/JX018212       | 0.706            | 0.719             | 0.698            | 0.675           | 0.706              | 0.711            | 0.643                 |
| BoNeV/Kirklareli/2012/TUR/NC 030793 | 0.670            | 0.671             | 0.655            | 0.646           | 0.666              | 0.658            | 0.613                 |
| BoNeV/Mukti/2016/IND/MN241817       | 0.673            | 0.675             | 0.659            | 0.653           | 0.671              | 0.668            | 0.615                 |
| BoNeV/LZB-1/2017/CHN/MG599036       | 0.720            | 0.728             | 0.709            | 0.685           | 0.719              | 0.707            | 0.660                 |
| YAKNeV/NRG-17/2017/CHN/MK452013     | 0.657            | 0.678             | 0.650            | 0.625           | 0.656              | 0.657            | 0.594                 |
| BoNeV/YLA-2/2017/CHN/MH718886       | 0.724            | 0.736             | 0.714            | 0.681           | 0.724              | 0.712            | 0.661                 |
| YAKNeV/HY1-2/2018/CHN/MK452012      | 0.661            | 0.678             | 0.651            | 0.638           | 0.659              | 0.661            | 0.599                 |
| BoNeV/11/2021/CHN/OP272996          | 0.655            | 0.66              | 0.644            | 0.634           | 0.655              | 0.655            | 0.6                   |
| BoNeV/11/2021/CHN/OP272997          | 0.67             | 0.677             | 0.66             | 0.647           | 0.671              | 0.672            | 0.613                 |
| BoNeV/11/2021/CHN/OP272998          | 0.655            | 0.66              | 0.644            | 0.634           | 0.655              | 0.655            | 0.6                   |
| BoNeV/11/2021/CHN/OP272999          | 0.686            | 0.69              | 0.674            | 0.658           | 0.684              | 0.674            | 0.628                 |
| BoNeV/11/2021/CHN/OP273000          | 0.671            | 0.675             | 0.659            | 0.66            | 0.67               | 0.675            | 0.618                 |

**Table S9.** A summary of observed RCDI (oRCDI) values and expected RCDI (eRCDI) values for VP1 genes of different NeVs corresponding to different hosts. The expected RCDI (eRCDI) values for all the hosts are provided in parenthesis after their names.

|           | <i>B. Taurus</i><br>(1.43) | <i>B. bubalis</i><br>(1.54) | <i>C. hircus</i><br>(1.57) | <i>O. aries</i><br>(1.65) | <i>E. caballus</i><br>(1.41) | <i>E. asinus</i><br>(1.61) | <i>C. dromedarius</i><br>(1.59) |
|-----------|----------------------------|-----------------------------|----------------------------|---------------------------|------------------------------|----------------------------|---------------------------------|
| MN241817  | 1.13                       | 1.17                        | 1.18                       | 1.19                      | 1.14                         | 1.17                       | 1.17                            |
| NC_030793 | 1.14                       | 1.18                        | 1.19                       | 1.20                      | 1.15                         | 1.18                       | 1.19                            |
| NC_006875 | 1.09                       | 1.11                        | 1.12                       | 1.18                      | 1.09                         | 1.15                       | 1.13                            |
| NC_004064 | 1.09                       | 1.11                        | 1.12                       | 1.18                      | 1.10                         | 1.15                       | 1.12                            |
| MG599036  | 1.10                       | 1.13                        | 1.14                       | 1.18                      | 1.11                         | 1.16                       | 1.13                            |
| JX018212  | 1.08                       | 1.11                        | 1.11                       | 1.16                      | 1.09                         | 1.13                       | 1.11                            |
| MH718886  | 1.09                       | 1.12                        | 1.12                       | 1.16                      | 1.09                         | 1.13                       | 1.11                            |
| MK452012  | 1.11                       | 1.11                        | 1.12                       | 1.20                      | 1.11                         | 1.14                       | 1.15                            |
| MK452013  | 1.11                       | 1.11                        | 1.12                       | 1.21                      | 1.11                         | 1.14                       | 1.15                            |
| NC_007916 | 1.08                       | 1.10                        | 1.11                       | 1.15                      | 1.09                         | 1.11                       | 1.11                            |
| OP272996  | 1.131                      | 1.166                       | 1.369                      | 1.197                     | 1.137                        | 1.186                      | 1.165                           |
| OP272997  | 1.134                      | 1.169                       | 1.323                      | 1.192                     | 1.139                        | 1.182                      | 1.168                           |
| OP272998  | 1.131                      | 1.166                       | 1.369                      | 1.197                     | 1.136                        | 1.186                      | 1.165                           |
| OP272999  | 1.141                      | 1.179                       | 1.249                      | 1.21                      | 1.145                        | 1.193                      | 1.19                            |
| OP273000  | 1.133                      | 1.168                       | 1.374                      | 1.183                     | 1.136                        | 1.167                      | 1.168                           |

**Table S10.** A summary of observed RCDI (oRCDI) values and expected RCDI (eRCDI) values for VP2 genes of different NeVs corresponding to different hosts. The expected RCDI (eRCDI) values for all the hosts are provided in parenthesis after their names.

|           | <i>B. Taurus</i><br>(1.47) | <i>B. bubalis</i><br>(1.57) | <i>C. hircus</i><br>(1.61) | <i>O. aries</i><br>(1.70) | <i>E. caballus</i><br>(1.52) | <i>E. asinus</i><br>(1.69) | <i>C. dromedarius</i><br>(1.60) |
|-----------|----------------------------|-----------------------------|----------------------------|---------------------------|------------------------------|----------------------------|---------------------------------|
| MN241817  | 1.34                       | 1.39                        | 1.39                       | 1.42                      | 1.35                         | 1.40                       | 1.42                            |
| NC_030793 | 1.32                       | 1.38                        | 1.37                       | 1.39                      | 1.34                         | 1.42                       | 1.39                            |
| NC_006875 | 1.29                       | 1.30                        | 1.31                       | 1.47                      | 1.29                         | 1.33                       | 1.37                            |
| NC_004064 | 1.42                       | 1.40                        | 1.41                       | 1.59                      | 1.40                         | 1.36                       | 1.51                            |
| MG599036  | 1.42                       | 1.43                        | 1.44                       | 1.63                      | 1.41                         | 1.45                       | 1.51                            |
| JX018212  | 1.44                       | 1.45                        | 1.47                       | 1.67                      | 1.44                         | 1.46                       | 1.56                            |
| MH718886  | 1.40                       | 1.40                        | 1.42                       | 1.62                      | 1.40                         | 1.45                       | 1.48                            |
| MK452012  | 1.41                       | 1.37                        | 1.43                       | 1.56                      | 1.41                         | 1.41                       | 1.49                            |
| MK452013  | 1.46                       | 1.42                        | 1.49                       | 1.67                      | 1.46                         | 1.48                       | 1.56                            |
| NC_007916 | 1.39                       | 1.39                        | 1.40                       | 1.59                      | 1.38                         | 1.41                       | 1.51                            |
| OP272996  | 1.335                      | 1.376                       | 1.179                      | 1.412                     | 1.34                         | 1.391                      | 1.399                           |

|          |       |       |       |       |       |       |       |
|----------|-------|-------|-------|-------|-------|-------|-------|
| OP272997 | 1.303 | 1.33  | 1.175 | 1.381 | 1.306 | 1.343 | 1.367 |
| OP272998 | 1.335 | 1.376 | 1.192 | 1.412 | 1.34  | 1.391 | 1.399 |
| OP272999 | 1.218 | 1.257 | 1.179 | 1.299 | 1.229 | 1.311 | 1.284 |
| OP273000 | 1.328 | 1.377 | 1.393 | 1.336 | 1.373 | 1.402 | 1.273 |



**Table S11.** A summary of frequencies of tRNA genes in different hosts (*Bos taurus*, *Equus caballus*, and *Ovis aries*) for most preferentially used codons in NeVs.

|                       | ALA  | ARG  | ASN  | ASP  | CYS  | GLN  | GLU  | GLY  | HIS  | ILE  | LEU | LYS  | PHE  | PRO  | SER  | THR  | TYR  | VAL  |
|-----------------------|------|------|------|------|------|------|------|------|------|------|-----|------|------|------|------|------|------|------|
| NC_030793             | GCC  | CGC  | AAC  | GAC  | TGC  | CAG  | GAG  | GGC  | CAC  | ATC  | CTC | AAG  | TTC  | CCC  | TCC  | ACC  | TAC  | GTC  |
| NC_006875             | GCC  | CGC  | AAC  | GAC  | TGC  | CAG  | GAG  | GGC  | CAC  | ATC  | CTG | AAG  | TTC  | CCC  | TCC  | ACC  | TAC  | GTG  |
| NC_004064             | GCC  | CGC  | AAC  | GAC  | TGC  | CAG  | GAG  | GGC  | CAC  | ATC  | CTG | AAG  | TTC  | CCC  | TCC  | ACC  | TAC  | GTG  |
| MG599036              | GCC  | CGC  | AAC  | GAC  | TGC  | CAG  | GAG  | GGC  | CAC  | ATC  | CTG | AAG  | TTC  | CCC  | TCC  | ACC  | TAC  | GTG  |
| JX018212              | GCC  | CGC  | AAC  | GAC  | TGC  | CAG  | GAG  | GGC  | CAC  | ATC  | CTC | AAG  | TTC  | CCC  | TCC  | ACC  | TAC  | GTG  |
| MH718886              | GCC  | CGC  | AAC  | GAC  | TGC  | CAG  | GAG  | GGC  | CAC  | ATC  | CTG | AAG  | TTC  | CCC  | TCC  | ACC  | TAC  | GTG  |
| MK452012              | GCC  | CGC  | AAC  | GAC  | TGC  | CAA  | GAG  | GGC  | CAC  | ATC  | CTC | AAG  | TTT  | CCC  | TCA  | ACC  | TAT  | GTT  |
| MK452013              | GCC  | CGC  | AAC  | GAT  | TGC  | CAA  | GAG  | GGC  | CAC  | ATC  | TTA | AAG  | TTT  | CCC  | TCA  | ACC  | TAC  | GTT  |
| NC_007916             | GCC  | CGC  | AAC  | GAC  | TGC  | CAG  | GAG  | GGC  | CAC  | ATC  | CTC | AAG  | TTC  | CCC  | TCC  | ACC  | TAC  | GTG  |
| KT119483              | GCC  | CGC  | AAC  | GAC  | TGC  | CAG  | GAG  | GGC  | CAC  | ATC  | CTC | AAG  | TTC  | CCC  | TCC  | ACC  | TAC  | GTC  |
| MN241817              | GCC  | CGC  | AAC  | GAC  | TGC  | CAG  | GAG  | GGT  | CAC  | ATC  | CTC | AAG  | TTC  | CCC  | TCC  | ACC  | TAC  | GTC  |
| OP272996              | GCC  | CGC  | AAC  | GAC  | TGT  | CAG  | GAG  | GGC  | CAC  | ATC  | CTC | AAG  | TTC  | CCC  | TCC  | ACC  | TAC  | GTC  |
| OP272997              | GCC  | CGC  | AAC  | GAC  | TGC  | CAG  | GAG  | GGC  | CAC  | ATC  | CTC | AAG  | TTC  | CCC  | TCC  | ACC  | TAC  | GTC  |
| OP272998              | GCC  | CGC  | AAC  | GAC  | TGT  | CAG  | GAG  | GGC  | CAC  | ATC  | CTC | AAG  | TTC  | CCC  | TCC  | ACC  | TAC  | GTC  |
| OP272999              | GCC  | CGC  | AAC  | GAC  | TGC  | CAG  | GAG  | GGC  | CAC  | ATC  | CTC | AAG  | TTC  | CCC  | TCC  | ACC  | TAC  | GTC  |
| OP273000              | GCC  | CGC  | AAC  | GAC  | TGC  | CAG  | GAG  | GGC  | CAC  | ATC  | CTC | AAG  | TTC  | CCC  | TCC  | ACC  | TAC  | GTC  |
| <i>Bos taurus</i>     | AGC  | TCG  | GTT  | GTC  | GCA  | CTG  | TTC  | GCC  | GTG  | AAT  | AAG | TTT  | GAA  | AGG  | GCT  | AGT  | GTA  | CAC  |
|                       | (30) | (10) | (27) | (23) | (27) | (20) | (31) | (16) | (16) | (16) | (9) | (31) | (23) | (13) | (20) | (12) | (17) | (17) |
|                       | TGC  | ACG  | ATT  | ATC  | ACA  | TTG  | CTC  | CCC  | ATG  | TAT  | CAG | CTT  | AAA  | TGG  | AGA  | TGT  | ATA  | AAC  |
|                       | (14) | (9)  | (0)  | (0)  | (0)  | (8)  | (11) | (14) | (0)  | (6)  | (8) | (22) | (0)  | (10) | (12) | (9)  | (0)  | (15) |
|                       | CGC  | CCT  |      |      |      |      |      | TCC  |      | GAT  | CAA |      |      | CGG  | CGA  | CGT  |      | TAC  |
|                       | (8)  | (8)  |      |      |      |      |      | (10) |      | (0)  | (6) |      |      | (4)  | (5)  | (6)  |      | (10) |
| <i>Equus caballus</i> | GGC  | TCT  |      |      |      |      |      | ACC  |      | CAT  | TAA |      |      | GGG  | TGA  | GGT  |      | GAC  |
|                       | (0)  | (6)  |      |      |      |      |      | (0)  |      | (0)  | (6) |      |      | (0)  | (4)  | (0)  |      | (0)  |
|                       | CCG  |      |      |      |      |      |      |      |      |      | TAG |      |      |      | GGA  |      |      |      |
|                       | (4)  |      |      |      |      |      |      |      |      |      | (4) |      |      |      | (2)  |      |      |      |
|                       | GCG  |      |      |      |      |      |      |      |      |      | GAG |      |      |      |      |      |      |      |
|                       | (0)  |      |      |      |      |      |      |      |      |      | (0) |      |      |      |      |      |      |      |
| Total                 | 52   | 37   | 27   | 23   | 27   | 28   | 42   | 40   | 16   | 22   | 35  | 53   | 23   | 27   | 41   | 27   | 17   | 42   |
| <i>Equus caballus</i> | AGC  | TCG  | GTT  | GTC  | GCA  | CTG  | TTC  | GCC  | GTG  | AAT  | AAG | TTT  | GAA  | AGG  | GCT  | AGT  | GTA  | CAC  |
|                       | (24) | (4)  | (14) | (8)  | (22) | (12) | (10) | (10) | (11) | (17) | (7) | (14) | (12) | (10) | (11) | (9)  | (14) | (14) |
|                       | TGC  | ACG  | ATT  | ATC  | ACA  | TTG  | CTC  | CCC  | ATG  | TAT  | CAG | CTT  | AAA  | TGG  | AGA  | TGT  | ATA  | AAC  |
|                       | (11) | (10) | (0)  | (0)  | (0)  | (5)  | (10) | (8)  | (0)  | (5)  | (3) | (14) | (0)  | (7)  | (12) | (7)  | (0)  | (12) |

|                   |                                                        |                                                                                  |                           |                           |                           |                           |                            |                                                         |                           |                                                       |                                                                                   |                            |                           |                                                       |                                                                      |                                                       |                           |                                                        |
|-------------------|--------------------------------------------------------|----------------------------------------------------------------------------------|---------------------------|---------------------------|---------------------------|---------------------------|----------------------------|---------------------------------------------------------|---------------------------|-------------------------------------------------------|-----------------------------------------------------------------------------------|----------------------------|---------------------------|-------------------------------------------------------|----------------------------------------------------------------------|-------------------------------------------------------|---------------------------|--------------------------------------------------------|
|                   | CGC<br>(8)<br>GGC<br>(0)                               | CCT<br>(7)<br>TCT<br>(5)<br>CCG<br>(4)<br>GCG<br>(0)                             |                           |                           |                           |                           |                            | TCC<br>(4)<br>ACC<br>(0)                                |                           | GAT<br>(0)<br>CAT<br>(0)                              | CAA<br>(6)<br>TAA<br>(4)<br>TAG<br>(5)<br>GAG<br>(0)                              |                            |                           | CGG<br>(3)<br>GGG<br>(0)                              | CGA<br>(4)<br>TGA<br>(4)<br>GGA<br>(0)                               | CGT<br>(3)<br>GGT<br>(0)                              |                           | TAC<br>(6)<br>GAC<br>(0)                               |
| Total             | 43                                                     | 30                                                                               | 14                        | 8                         | 22                        | 17                        | 20                         | 22                                                      | 11                        | 22                                                    | 25                                                                                | 28                         | 12                        | 20                                                    | 31                                                                   | 19                                                    | 14                        | 32                                                     |
|                   | ALA                                                    | ARG                                                                              | ASN                       | ASP                       | CYS                       | GLN                       | GLU                        | GLY                                                     | HIS                       | ILE                                                   | LEU                                                                               | LYS                        | PHE                       | PRO                                                   | SER                                                                  | THR                                                   | TYR                       | VAL                                                    |
| <i>Ovis aries</i> | AGC<br>(29)<br>TGC<br>(16)<br>CGC<br>(8)<br>GGC<br>(0) | TCG<br>(9)<br>ACG<br>(9)<br>CCT<br>(8)<br>TCT<br>(6)<br>CCG<br>(4)<br>GCG<br>(0) | GTT<br>(20)<br>ATT<br>(0) | GTC<br>(13)<br>ATC<br>(0) | GCA<br>(28)<br>ACA<br>(0) | CTG<br>(12)<br>TTG<br>(7) | TTC<br>(29)<br>CTC<br>(13) | GCC<br>(14)<br>CCC<br>(10)<br>TCC<br>(11)<br>ACC<br>(0) | GTG<br>(12)<br>ATG<br>(0) | AAT<br>(13)<br>TAT<br>(5)<br>GAT<br>(1)<br>CAT<br>(0) | AAG<br>(10)<br>CAG<br>(5)<br>CAA<br>(6)<br>TAA<br>(6)<br>TAG<br>(4)<br>GAG<br>(0) | TTT<br>(23)<br>CTT<br>(22) | GAA<br>(24)<br>AAA<br>(0) | AGG<br>(12)<br>TGG<br>(7)<br>CGG<br>(5)<br>GGG<br>(0) | GCT<br>(14)<br>AGA<br>(15)<br>CGA<br>(4)<br>TGA<br>(4)<br>GGA<br>(0) | AGT<br>(10)<br>TGT<br>(7)<br>CGT<br>(5)<br>GGT<br>(0) | GTA<br>(19)<br>ATA<br>(0) | CAC<br>(10)<br>AAC<br>(11)<br>TAC<br>(5)<br>GAC<br>(0) |
| Total             | 53                                                     | 36                                                                               | 20                        | 13                        | 28                        | 19                        | 42                         | 35                                                      | 12                        | 19                                                    | 31                                                                                | 45                         | 24                        | 24                                                    | 37                                                                   | 22                                                    | 19                        | 26                                                     |

**Table S12.** A summary of recombination events observed from multiple sequence alignment of complete genome sequences of NeVs. The recombination events that are detected by at least 2 methods, out of total seven methods used, are accounted here. The recombinants, major parents and its position on genome and the minor parents with its position on genome are provided.

| Recombinant | Major Parent | Positions             | Minor Parent | Positions             |
|-------------|--------------|-----------------------|--------------|-----------------------|
| MG599036    | JX018212     | 1 – 5317; 7100 – 7935 | NC_007916*   | 5318 – 7099           |
| NC_007916   | MH718886*    | 1 – 5291; 7353 – 7935 | NC_004064    | 5292 – 7352           |
| NC_004064   | NC_007916    | 5292 – 7915           | MH718886     | 1 – 5291; 7916 – 7935 |
| JX018212    | MH718886     | 1 – 5349; 7431 – 7935 | NC004064     | 5350 – 7430           |

## Supplementary Figures

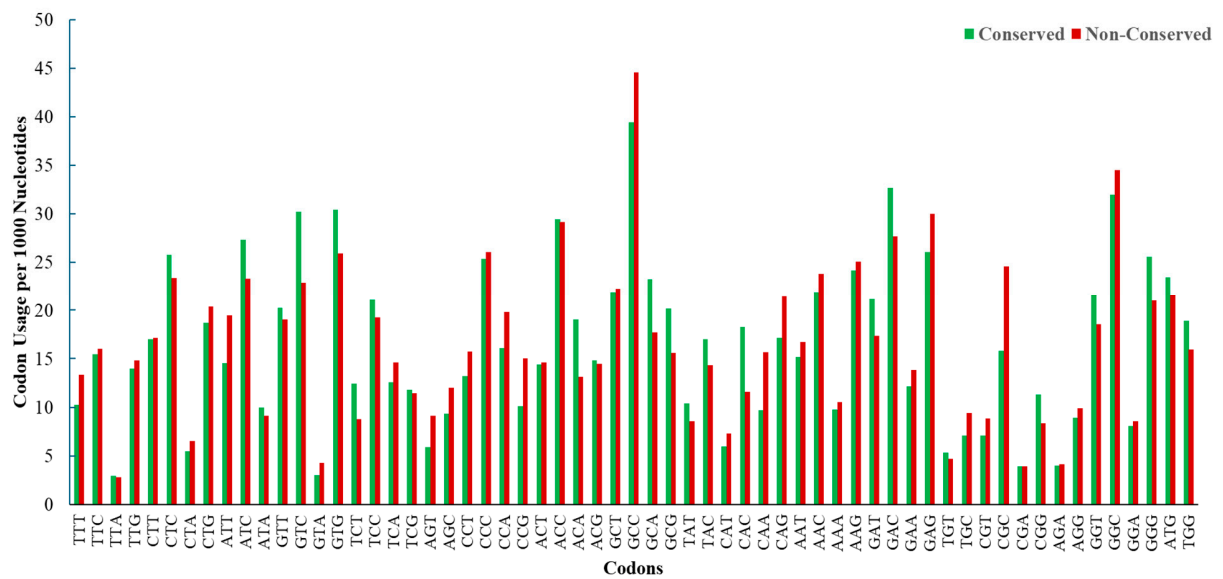

**Figure S1.** A depiction of an overall codon usage in conserved and non-conserved regions of VP1 and VP2 genes of NeVs.

|           | OP273000 | NC_030793 | KT119483 | MN241817 | OP272999 | OP272996 | OP272998 | OP272997 | MK452012 | MK452013 | MG599036 | NC_007916 | MH718886 | NC_006875 | NC_004064 | JX018212 |
|-----------|----------|-----------|----------|----------|----------|----------|----------|----------|----------|----------|----------|-----------|----------|-----------|-----------|----------|
| OP273000  |          | 88        | 88       | 89       | 100      | 90       | 90       | 91       | 31       | 29       | 30       | 31        | 29       | 29        | 31        | 31       |
| NC_030793 | 92       |           | 100      | 89       | 89       | 89       | 89       | 89       | 30       | 30       | 30       | 30        | 30       | 29        | 31        | 30       |
| KT119483  | 92       | 100       |          | 89       | 89       | 89       | 89       | 89       | 30       | 30       | 30       | 30        | 30       | 29        | 31        | 30       |
| MN241817  | 92       | 96        | 96       |          | 89       | 89       | 89       | 89       | 30       | 30       | 30       | 30        | 30       | 29        | 31        | 30       |
| OP272999  | 93       | 93        | 93       | 93       |          | 90       | 90       | 91       | 30       | 31       | 31       | 30        | 30       | 29        | 31        | 31       |
| OP272996  | 93       | 92        | 92       | 92       | 93       |          | 100      | 99       | 30       | 29       | 31       | 31        | 31       | 30        | 31        | 31       |
| OP272998  | 93       | 92        | 92       | 92       | 93       | 100      |          | 99       | 30       | 29       | 31       | 31        | 31       | 30        | 31        | 31       |
| OP272997  | 93       | 92        | 92       | 92       | 93       | 100      | 100      |          | 30       | 30       | 31       | 32        | 31       | 30        | 31        | 32       |
| MK452012  | 43       | 43        | 43       | 43       | 43       | 43       | 43       | 43       |          | 97       | 79       | 80        | 80       | 79        | 79        | 77       |
| MK452013  | 43       | 43        | 43       | 43       | 43       | 43       | 43       | 43       | 96       |          | 80       | 80        | 81       | 80        | 79        | 78       |
| MG599036  | 42       | 43        | 43       | 43       | 43       | 43       | 43       | 43       | 75       | 75       |          | 94        | 96       | 94        | 92        | 92       |
| NC_007916 | 42       | 43        | 43       | 43       | 43       | 43       | 43       | 43       | 76       | 76       | 88       |           | 96       | 95        | 95        | 96       |
| MH718886  | 42       | 43        | 43       | 43       | 43       | 43       | 43       | 43       | 76       | 76       | 93       | 92        |          | 96        | 93        | 92       |
| NC_006875 | 42       | 43        | 43       | 42       | 43       | 43       | 43       | 43       | 76       | 76       | 91       | 93        | 96       |           | 92        | 94       |
| NC_004064 | 42       | 43        | 43       | 43       | 43       | 43       | 43       | 43       | 76       | 76       | 91       | 94        | 96       | 97        |           | 94       |
| JX018212  | 43       | 43        | 43       | 43       | 43       | 43       | 43       | 43       | 76       | 76       | 91       | 93        | 96       | 95        | 97        |          |

**Figure S2.** A heatmap representation of pairwise homology of VP1 and VP2 genes of different NeVs. The lower triangle represents VP1 genes while the upper triangle represents VP2 genes.
